# Supplementary material for: Exogenous application of gamma-amino butyric acid alleviates temperature stress in mungbean (Vigna radiata) and its wild non-progenitor (Vigna glabrescens) by regulating heat shock protein genes
Source: Research Square preprint supplement (doi:10.21203/rs.3.rs-7194231/v1), 2025-08-08
Supplement: Supplementary file 1 [file 1ba9625d7a0bc2792ba12ea1.docx]

**Table S1A**. The physicochemical characterization of VrHSP candidates in the Vigna radiata genome

| **S. No.** | **Gene Name** | **Gene code** | **Peptide sequence** | **Molecular weight (kDa)** | **pI** | **Instability index** | **Aliphatic Index** | **Gravy** |
| --- | --- | --- | --- | --- | --- | --- | --- | --- |
| 1 | VrHSP-20.1 | [vigra.Vradi0007s02590](https://legacy.legumeinfo.org/feature/Vigna/radiata/gene/Vradi0007s02590.Vradi.ver6) | 195 | 22.7718 | 5.33 | 59.13, unstable | 72.00 | -0.710 |
| 2 | VrHSP-20.2 | [vigra.Vradi0023s00520](https://legacy.legumeinfo.org/feature/Vigna/radiata/gene/Vradi0023s00520.Vradi.ver6) | 207 | 23.9820 | 6.39 | 48.83, unstable | 67.73 | -0.648 |
| 3 | VrHSP-20.3 | [vigra.Vradi0051s00020](https://legacy.legumeinfo.org/feature/Vigna/radiata/gene/Vradi0051s00020.Vradi.ver6) | 153 | 17.3638 | 7.90 | 36.37, stable | 80.13 | -0.633 |
| 4 | VrHSP-20.4 | [vigra.Vradi0158s00470](https://legacy.legumeinfo.org/feature/Vigna/radiata/gene/Vradi0158s00470.Vradi.ver6) | 346 | 38.7322 | 6.24 | 43.09, unstable | 81.13 | -0.308 |
| 5 | VrHSP-20.5 | [vigra.Vradi01g05940](https://legacy.legumeinfo.org/feature/Vigna/radiata/gene/Vradi01g05940.Vradi.ver6) | 152 | 17.3880 | 9.06 | 21.53, stable | 91.18 | -0.274 |
| 6 | VrHSP-20.6 | [vigra.Vradi01g06620](https://legacy.legumeinfo.org/feature/Vigna/radiata/gene/Vradi01g06620.Vradi.ver6) | 186 | 21.1634 | 6.86 | 37.35, stable | 92.15 | -0.458 |
| 7 | VrHSP-20.7 | [vigra.Vradi01g06630](https://legacy.legumeinfo.org/feature/Vigna/radiata/gene/Vradi01g06630.Vradi.ver6) | 186 | 21.1564 | 6.34 | 40.33, unstable | 88.55 | -0.428 |
| 8 | VrHSP-20.8 | [vigra.Vradi01g08280](https://legacy.legumeinfo.org/feature/Vigna/radiata/gene/Vradi01g08280.Vradi.ver6) | 83 | 9.4640 | 6.72 | 32.26, stable | 87.95 | -0.419 |
| 9 | VrHSP-20.9 | [vigra.Vradi02g01230](https://legacy.legumeinfo.org/feature/Vigna/radiata/gene/Vradi02g01230.Vradi.ver6) | 209 | 23.4575 | 7.78 | 54.42, unstable | 74.21 | -0.611 |
| 10 | VrHSP-20.10 | [vigra.Vradi02g04550](https://legacy.legumeinfo.org/feature/Vigna/radiata/gene/Vradi02g04550.Vradi.ver6) | 140 | 15.6256 | 4.68 | 34.10, stable | 82.00 | -0.331 |
| 11 | VrHSP-20.11 | [vigra.Vradi02g12160](https://legacy.legumeinfo.org/feature/Vigna/radiata/gene/Vradi02g12160.Vradi.ver6) | 236 | 27.1532 | 8.89 | 57.26, unstable | 63.69 | -0.811 |
| 12 | VrHSP-20.12 | [vigra.Vradi0371s00040](https://legacy.legumeinfo.org/feature/Vigna/radiata/gene/Vradi0371s00040.Vradi.ver6) | 395 | 44.6530 | 5.53 | 43.07, unstable | 55.37 | -1.059 |
| 13 | VrHSP-20.13 | [vigra.Vradi0373s00020](https://legacy.legumeinfo.org/feature/Vigna/radiata/gene/Vradi0373s00020.Vradi.ver6) | 235 | 26.6814 | 8.98 | 38.80, stable | 69.66 | -0.654 |
| 14 | VrHSP-20.14 | [vigra.Vradi03g09850](https://legacy.legumeinfo.org/feature/Vigna/radiata/gene/Vradi03g09850.Vradi.ver6) | 284 | 32.4175 | 5.40 | 45.20, unstable | 72.32 | -0.952 |
| 15 | VrHSP-20.15 | [vigra.Vradi0406s00010](https://legacy.legumeinfo.org/feature/Vigna/radiata/gene/Vradi0406s00010.Vradi.ver6) | 168 | 19.3299 | 8.48 | 63.11, unstable | 66.67 | -0.741 |
| 16 | VrHSP-20.16 | [vigra.Vradi05g21660](https://legacy.legumeinfo.org/feature/Vigna/radiata/gene/Vradi05g21660.Vradi.ver6) | 374 | 42.2320 | 9.17 | 50.63, unstable | 62.54 | -0.989 |
| 17 | VrHSP-20.17 | [vigra.Vradi06g03380](https://legacy.legumeinfo.org/feature/Vigna/radiata/gene/Vradi06g03380.Vradi.ver6) | 455 | 51.7059 | 5.71 | 45.89, unstable | 67.10 | -0.986 |
| 18 | VrHSP-20.18 | [vigra.Vradi06g05610](https://legacy.legumeinfo.org/feature/Vigna/radiata/gene/Vradi06g05610.Vradi.ver6) | 110 | 12.4412 | 6.12 | 39.12, stable | 97.36 | -0.480 |
| 19 | VrHSP-20.19 | [vigra.Vradi07g02090](https://legacy.legumeinfo.org/feature/Vigna/radiata/gene/Vradi07g02090.Vradi.ver6) | 550 | 60.9352 | 5.26 | 44.54, unstable | 76.16 | -0.611 |
| 20 | VrHSP-20.20 | [vigra.Vradi07g15370](https://legacy.legumeinfo.org/feature/Vigna/radiata/gene/Vradi07g15370.Vradi.ver6) | 1321 | 150.0412 | 7.19 | 48.81, unstable | 79.77 | -0.480 |
| 21 | VrHSP-20.21 | [vigra.Vradi07g16570](https://legacy.legumeinfo.org/feature/Vigna/radiata/gene/Vradi07g16570.Vradi.ver6) | 131 | 14.2641 | 5.16 | 44.32, unstable | 69.92 | -0.412 |
| 22 | VrHSP-20.22 | [vigra.Vradi08g02620](https://legacy.legumeinfo.org/feature/Vigna/radiata/gene/Vradi08g02620.Vradi.ver6) | 213 | 24.3879 | 7.80 | 37.05, stable | 79.25 | -0.626 |
| 23 | VrHSP-20.23 | [vigra.Vradi08g14320](https://legacy.legumeinfo.org/feature/Vigna/radiata/gene/Vradi08g14320.Vradi.ver6) | 191 | 22.0004 | 6.61 | 45.97, unstable | 94.35 | -0.542 |
| 24 | VrHSP-20.24 | [vigra.Vradi08g18110](https://legacy.legumeinfo.org/feature/Vigna/radiata/gene/Vradi08g18110.Vradi.ver6) | 392 | 44.0246 | 6.25 | 35.98, stable | 69.57 | -0.772 |
| 25 | VrHSP-20.25 | [vigra.Vradi09g00710](https://legacy.legumeinfo.org/feature/Vigna/radiata/gene/Vradi09g00710.Vradi.ver6) | 223 | 25.5458 | 8.89 | 45.34, unstable | 71.30 | -0.861 |
| 26 | VrHSP-20.26 | [vigra.Vradi09g02820](https://legacy.legumeinfo.org/feature/Vigna/radiata/gene/Vradi09g02820.Vradi.ver6) | 155 | 17.3258 | 8.59 | 42.01, unstable | 87.94 | -0.401 |
| 27 | VrHSP-20.27 | [vigra.Vradi11g06880](https://legacy.legumeinfo.org/feature/Vigna/radiata/gene/Vradi11g06880.Vradi.ver6) | 260 | 28.7263 | 7.65 | 55.20, unstable | 73.12 | -0.387 |
| 28 | VrHSP-20.28 | [vigra.Vradi11g07380](https://legacy.legumeinfo.org/feature/Vigna/radiata/gene/Vradi11g07380.Vradi.ver6) | 608 | 67.0950 | 5.36 | 47.73, unstable | 73.75 | -0.595 |
| 29 | VrCpn60_TCP1.1 | [vigra.Vradi0023s00800](https://legacy.legumeinfo.org/feature/Vigna/radiata/gene/Vradi0023s00800.Vradi.ver6) | 614 | 66.6200 | 5.75 | 30.92, stable | 100.77 | -0.068 |
| 30 | VrCpn60_TCP1.2 | [vigra.Vradi0153s00240](https://legacy.legumeinfo.org/feature/Vigna/radiata/gene/Vradi0153s00240.Vradi.ver6) | 500 | 53.9752 | 5.32 | 35.13, stable | 98.50 | -0.019 |
| 31 | VrCpn60_TCP1.3 | [vigra.Vradi01g02250](https://legacy.legumeinfo.org/feature/Vigna/radiata/gene/Vradi01g02250.Vradi.ver6) | 481 | 51.8765 | 5.93 | 30.47, stable | 119.96 | 0.227 |
| 32 | VrCpn60_TCP1.4 | [vigra.Vradi01g06390](https://legacy.legumeinfo.org/feature/Vigna/radiata/gene/Vradi01g06390.Vradi.ver6) | 512 | 55.7084 | 5.48 | 36.20, stable | 100.82 | -0.136 |
| 33 | VrCpn60_TCP1.5 | [vigra.Vradi0215s00040](https://legacy.legumeinfo.org/feature/Vigna/radiata/gene/Vradi0215s00040.Vradi.ver6) | 1774 | 197.6737 | 5.81 | 43.56, unstable | 76.79 | -0.461 |
| 34 | VrCpn60_TCP1.6 | [vigra.Vradi02g06070](https://legacy.legumeinfo.org/feature/Vigna/radiata/gene/Vradi02g06070.Vradi.ver6) | 557 | 58.8202 | 5.22 | 30.03, stable | 106.36 | -0.040 |
| 35 | VrCpn60_TCP1.7 | [vigra.Vradi02g06810](https://legacy.legumeinfo.org/feature/Vigna/radiata/gene/Vradi02g06810.Vradi.ver6) | 517 | 56.4121 | 5.36 | 34.55, stable | 102.44 | -0.015 |
| 36 | VrCpn60_TCP1.8 | [vigra.Vradi02g12290](https://legacy.legumeinfo.org/feature/Vigna/radiata/gene/Vradi02g12290.Vradi.ver6) | 400 | 44.1488 | 5.99 | 44.62, unstable | 91.50 | -0.248 |
| 37 | VrCpn60_TCP1.9 | [vigra.Vradi0305s00110](https://legacy.legumeinfo.org/feature/Vigna/radiata/gene/Vradi0305s00110.Vradi.ver6) | 302 | 32.9993 | 6.31 | 21.89, stable | 104.54 | 0.197 |
| 38 | VrCpn60_TCP1.10 | [vigra.Vradi0372s00050](https://legacy.legumeinfo.org/feature/Vigna/radiata/gene/Vradi0372s00050.Vradi.ver6) | 479 | 51.1967 | 5.30 | 29.87, stable | 98.73 | -0.042 |
| 39 | VrCpn60_TCP1.11 | [vigra.Vradi04g01040](https://legacy.legumeinfo.org/feature/Vigna/radiata/gene/Vradi04g01040.Vradi.ver6) | 106 | 11.3313 | 7.79 | 43.43, unstable | 112.45 | 0.166 |
| 40 | VrCpn60_TCP1.12 | [vigra.Vradi04g11310](https://legacy.legumeinfo.org/feature/Vigna/radiata/gene/Vradi04g11310.Vradi.ver6) | 503 | 56.2382 | 6.16 | 39.20, stable | 103.66 | -0.061 |
| 41 | VrCpn60_TCP1.13 | [vigra.Vradi05g18980](https://legacy.legumeinfo.org/feature/Vigna/radiata/gene/Vradi05g18980.Vradi.ver6) | 560 | 59.6051 | 5.44 | 32.83, stable | 100.32 | -0.090 |
| 42 | VrCpn60_TCP1.14 | [vigra.Vradi06g03350](https://legacy.legumeinfo.org/feature/Vigna/radiata/gene/Vradi06g03350.Vradi.ver6) | 567 | 61.0239 | 6.39 | 35.23, stable | 96.74 | -0.075 |
| 43 | VrCpn60_TCP1.15 | [vigra.Vradi07g04280](https://legacy.legumeinfo.org/feature/Vigna/radiata/gene/Vradi07g04280.Vradi.ver6) | 1612 | 181.1467 | 6.22 | 48.11, unstable | 76.97 | -0.440 |
| 44 | VrCpn60_TCP1.16 | [vigra.Vradi07g04700](https://legacy.legumeinfo.org/feature/Vigna/radiata/gene/Vradi07g04700.Vradi.ver6) | 570 | 60.4954 | 6.11 | 28.94, stable | 111.74 | 0.165 |
| 45 | VrCpn60_TCP1.17 | [vigra.Vradi07g19530](https://legacy.legumeinfo.org/feature/Vigna/radiata/gene/Vradi07g19530.Vradi.ver6) | 525 | 57.0318 | 5.87 | 28.62, stable | 101.47 | -0.078 |
| 46 | VrCpn60_TCP1.18 | [vigra.Vradi07g23740](https://legacy.legumeinfo.org/feature/Vigna/radiata/gene/Vradi07g23740.Vradi.ver6) | 1493 | 167.3896 | 6.12 | 47.17, unstable | 73.97 | -0.495 |
| 47 | VrCpn60_TCP1.19 | [vigra.Vradi08g03920](https://legacy.legumeinfo.org/feature/Vigna/radiata/gene/Vradi08g03920.Vradi.ver6) | 516 | 54.8710 | 5.58 | 27.46, stable | 99.81 | -0.109 |
| 48 | VrCpn60_TCP1.20 | [vigra.Vradi08g15650](https://legacy.legumeinfo.org/feature/Vigna/radiata/gene/Vradi08g15650.Vradi.ver6) | 576 | 61.3926 | 5.90 | 27.79, stable | 99.24 | -0.095 |
| 49 | VrCpn60_TCP1.21 | [vigra.Vradi08g17430](https://legacy.legumeinfo.org/feature/Vigna/radiata/gene/Vradi08g17430.Vradi.ver6) | 1586 | 177.8171 | 5.43 | 46.77, unstable | 75.93 | -0.481 |
| 50 | VrCpn60_TCP1.22 | [vigra.Vradi09g02010](https://legacy.legumeinfo.org/feature/Vigna/radiata/gene/Vradi09g02010.Vradi.ver6) | 516 | 54.7555 | 7.57 | 23.68, stable | 95.45 | -0.169 |
| 51 | VrCpn60_TCP1.23 | [vigra.Vradi10g02080](https://legacy.legumeinfo.org/feature/Vigna/radiata/gene/Vradi10g02080.Vradi.ver6) | 605 | 65.4311 | 9.11 | 32.29, stable | 102.17 | -0.074 |
| 52 | VrHSP-70.1 | [vigra.Vradi0351s00060](https://legacy.legumeinfo.org/feature/Vigna/radiata/gene/Vradi0351s00060.Vradi.ver6) | 597 | 66.3291 | 6.07 | 44.19, unstable | 90.47 | -0.235 |
| 53 | VrHSP-70.2 | [vigra.Vradi04g08470](https://legacy.legumeinfo.org/feature/Vigna/radiata/gene/Vradi04g08470.Vradi.ver6) | 851 | 94.4045 | 5.51 | 39.22, stable | 86.32 | -0.469 |
| 54 | VrHSP-70.3 | [vigra.Vradi04g10800](https://legacy.legumeinfo.org/feature/Vigna/radiata/gene/Vradi04g10800.Vradi.ver6) | 497 | 55.8400 | 8.59 | 40.68, unstable | 78.43 | -0.327 |
| 55 | VrHSP-70.4 | [vigra.Vradi05g20230](https://legacy.legumeinfo.org/feature/Vigna/radiata/gene/Vradi05g20230.Vradi.ver6) | 786 | 87.3675 | 5.71 | 44.61, unstable | 78.80 | -0.452 |
| 56 | VrHSP-70.5 | [vigra.Vradi06g01820](https://legacy.legumeinfo.org/feature/Vigna/radiata/gene/Vradi06g01820.Vradi.ver6) | 69 | 7.7581 | 10.22 | 22.50, stable | 78.99 | -0.504 |
| 57 | VrHSP-70.6 | [vigra.Vradi07g06150](https://legacy.legumeinfo.org/feature/Vigna/radiata/gene/Vradi07g06150.Vradi.ver6) | 195 | 21.6910 | 7.78 | 27.44, stable | 98.87 | -0.190 |
| 58 | VrHSP-70.7 | [vigra.Vradi07g06390](https://legacy.legumeinfo.org/feature/Vigna/radiata/gene/Vradi07g06390.Vradi.ver6) | 673 | 72.1456 | 5.88 | 39.42, stable | 84.81 | -0.326 |
| 59 | VrHSP-70.8 | [vigra.Vradi07g14150](https://legacy.legumeinfo.org/feature/Vigna/radiata/gene/Vradi07g14150.Vradi.ver6) | 647 | 70.9356 | 5.30 | 32.28, stable | 85.33 | -0.391 |
| 60 | VrHSP-70.9 | [vigra.Vradi07g21470](https://legacy.legumeinfo.org/feature/Vigna/radiata/gene/Vradi07g21470.Vradi.ver6) | 567 | 62.0054 | 4.99 | 33.21, stable | 83.07 | -0.325 |
| 61 | VrHSP-70.10 | [vigra.Vradi08g08320](https://legacy.legumeinfo.org/feature/Vigna/radiata/gene/Vradi08g08320.Vradi.ver6) | 834 | 93.9469 | 8.72 | 42.62, unstable | 88.86 | -0.262 |
| 62 | VrHSP-70.11 | [vigra.Vradi08g11350](https://legacy.legumeinfo.org/feature/Vigna/radiata/gene/Vradi08g11350.Vradi.ver6) | 775 | 85.6742 | 5.59 | 39.00, stable | 77.65 | -0.441 |
| 63 | VrHSP-70.12 | [vigra.Vradi09g01130](https://legacy.legumeinfo.org/feature/Vigna/radiata/gene/Vradi09g01130.Vradi.ver6) | 263 | 27.6905 | 5.48 | 49.76, unstable | 89.35 | -0.191 |
| 64 | VrHSP-70.13 | [vigra.Vradi10g12020](https://legacy.legumeinfo.org/feature/Vigna/radiata/gene/Vradi10g12020.Vradi.ver6) | 449 | 49.1161 | 9.36 | 42.31, unstable | 90.11 | -0.287 |
| 65 | VrHSP-70.14 | [vigra.Vradi10g13400](https://legacy.legumeinfo.org/feature/Vigna/radiata/gene/Vradi10g13400.Vradi.ver6) | 573 | 62.1238 | 5.72 | 39.42, stable | 99.86 | 0.061 |
| 66 | VrHSP-70.15 | [vigra.Vradi11g00650](https://legacy.legumeinfo.org/feature/Vigna/radiata/gene/Vradi11g00650.Vradi.ver6) | 62 | 6.9667 | 4.61 | 43.83, unstable | 69.19 | -0.990 |
| 67 | VrHSP-70.16 | [vigra.Vradi1393s00010](https://legacy.legumeinfo.org/feature/Vigna/radiata/gene/Vradi1393s00010.Vradi.ver6) | 121 | 13.7192 | 4.46 | 34.77, stable | 55.79 | -1.226 |
| 68 | VrHSP-70.17 | [vigra.Vradi2697s00010](https://legacy.legumeinfo.org/feature/Vigna/radiata/gene/Vradi2697s00010.Vradi.ver6) | 932 | 103.5807 | 6.09 | 41.05, unstable | 93.22 | -0.329 |
| 69 | VrHSP-90.1 | [vigra.Vradi01g13880](https://legacy.legumeinfo.org/feature/Vigna/radiata/gene/Vradi01g13880.Vradi.ver6) | 932 | 103.5807 | 6.09 | 41.05, unstable | 93.22 | -0.329 |
| 70 | VrHSP-90.2 | [vigra.Vradi0293s00140](https://legacy.legumeinfo.org/feature/Vigna/radiata/gene/Vradi0293s00140.Vradi.ver6) | 234 | 25.3951 | 8.97 | 33.47, stable | 83.08 | -0.229 |
| 71 | VrHSP-90.3 | [vigra.Vradi0293s00150](https://legacy.legumeinfo.org/feature/Vigna/radiata/gene/Vradi0293s00150.Vradi.ver6) | 1061 | 118.7628 | 7.02 | 38.49, stable | 92.17 | -0.331 |
| 72 | VrHSP-90.4 | [vigra.Vradi06g00570](https://legacy.legumeinfo.org/feature/Vigna/radiata/gene/Vradi06g00570.Vradi.ver6) | 1016 | 114.2593 | 6.12 | 42.60, unstable | 90.25 | -0.367 |
| 73 | VrHSP-90.5 | [vigra.Vradi06g00870](https://legacy.legumeinfo.org/feature/Vigna/radiata/gene/Vradi06g00870.Vradi.ver6) | 1107 | 122.7790 | 7.12 | 53.52, unstable | 75.47 | -0.440 |
| 74 | VrHSP-90.6 | [vigra.Vradi06g16510](https://legacy.legumeinfo.org/feature/Vigna/radiata/gene/Vradi06g16510.Vradi.ver6) | 924 | 101.7958 | 8.96 | 36.40, stable | 95.93 | -0.181 |
| 75 | VrHSP-90.7 | [vigra.Vradi11g12260](https://legacy.legumeinfo.org/feature/Vigna/radiata/gene/Vradi11g12260.Vradi.ver6) | 996 | 111.9236 | 6.29 | 40.79, unstable | 93.31 | -0.401 |
| 76 | VrHSP-100.1 | [vigra.Vradi0185s00040](https://legacy.legumeinfo.org/feature/Vigna/radiata/gene/Vradi0185s00040.Vradi.ver6) | 234 | 25.3951 | 8.97 | 33.47, stable | 83.08 | -0.229 |
| 77 | VrHSP-100.2 | [vigra.Vradi01g06820](https://legacy.legumeinfo.org/feature/Vigna/radiata/gene/Vradi01g06820.Vradi.ver6) | 1061 | 118.7628 | 7.02 | 38.49, stable | 92.17 | -0.331 |
| 78 | VrHSP-100.3 | [vigra.Vradi01g07560](https://legacy.legumeinfo.org/feature/Vigna/radiata/gene/Vradi01g07560.Vradi.ver6) | 1016 | 114.2593 | 6.12 | 42.60, unstable | 90.25 | -0.367 |
| 79 | VrHSP-100.4 | [vigra.Vradi04g09110](https://legacy.legumeinfo.org/feature/Vigna/radiata/gene/Vradi04g09110.Vradi.ver6) | 1107 | 122.7790 | 7.12 | 53.52, unstable | 75.47 | -0.440 |
| 80 | VrHSP-100.5 | [vigra.Vradi05g06050](https://legacy.legumeinfo.org/feature/Vigna/radiata/gene/Vradi05g06050.Vradi.ver6) | 924 | 101.7958 | 8.96 | 36.40, stable | 95.93 | -0.181 |
| 81 | VrHSP-100.6 | [vigra.Vradi05g10860](https://legacy.legumeinfo.org/feature/Vigna/radiata/gene/Vradi05g10860.Vradi.ver6) | 996 | 111.9236 | 6.29 | 40.79, unstable | 93.31 | -0.401 |
| 82 | VrHSP-100.7 | [vigra.Vradi06g04470](https://legacy.legumeinfo.org/feature/Vigna/radiata/gene/Vradi06g04470.Vradi.ver6) | 878 | 97.7440 | 8.27 | 50.72, unstable | 85.23 | -0.342 |
| 83 | VrHSP-100.8 | [vigra.Vradi07g21860](https://legacy.legumeinfo.org/feature/Vigna/radiata/gene/Vradi07g21860.Vradi.ver6) | 965 | 105.5185 | 6.36 | 46.48, unstable | 86.35 | -0.434 |
| 84 | VrHSP-100.9 | [vigra.Vradi07g29920](https://legacy.legumeinfo.org/feature/Vigna/radiata/gene/Vradi07g29920.Vradi.ver6) | 923 | 102.5807 | 6.32 | 43.44, unstable | 91.81 | -0.380 |
| 85 | VrHSP-100.10 | [vigra.Vradi08g15870](https://legacy.legumeinfo.org/feature/Vigna/radiata/gene/Vradi08g15870.Vradi.ver6) | 848 | 94.6305 | 6.52 | 51.58, unstable | 79.96 | -0.377 |
| 86 | VrHSP-100.11 | [vigra.Vradi11g02650](https://legacy.legumeinfo.org/feature/Vigna/radiata/gene/Vradi11g02650.Vradi.ver6) | 252 | 27.8450 | 9.03 | 54.53, unstable | 85.99 | -0.189 |
| 87 | VrHSP-100.12 | [vigra.Vradi01g06660](https://legacy.legumeinfo.org/feature/Vigna/radiata/gene/Vradi01g06660.Vradi.ver6) | 611 | 66.4598 | 6.75 | 38.89, stable | 86.84 | -0.251 |
| 88 | VrHSP-100.13 | [vigra.Vradi08g14330](https://legacy.legumeinfo.org/feature/Vigna/radiata/gene/Vradi08g14330.Vradi.ver6) | 544 | 59.2858 | 6.11 | 36.82, stable | 93.42 | -0.091 |
| 89 | VrHSP-100.14 | [vigra.Vradi09g07850](https://legacy.legumeinfo.org/feature/Vigna/radiata/gene/Vradi09g07850.Vradi.ver6) | 583 | 64.8308 | 6.51 | 32.09, stable | 98.01 | -0.245 |
| 90 | VrHSP-100.15 | [vigra.Vradi10g01130](https://legacy.legumeinfo.org/feature/Vigna/radiata/gene/Vradi10g01130.Vradi.ver6) | 537 | 57.7817 | 6.07 | 31.38, stable | 89.35 | -0.156 |
| 91 | VrHSP-100.16 | [vigra.Vradi03g10190](https://legacy.legumeinfo.org/feature/Vigna/radiata/gene/Vradi03g10190.Vradi.ver6) | 828 | 90.8733 | 6.31 | 42.83, unstable | 84.48 | -0.362 |
| 92 | VrHSP-100.17 | [vigra.Vradi06g08680](https://legacy.legumeinfo.org/feature/Vigna/radiata/gene/Vradi06g08680.Vradi.ver6) | 798 | 88.5034 | 7.87 | 45.05, unstable | 81.44 | -0.322 |
| 93 | VrHSP-100.18 | [vigra.Vradi10g03690](https://legacy.legumeinfo.org/feature/Vigna/radiata/gene/Vradi10g03690.Vradi.ver6) | 950 | 104.9732 | 6.60 | 46.08, unstable | 81.36 | -0.289 |
| 94 | VrHSP-100.19 | [vigra.Vradi1556s00010](https://legacy.legumeinfo.org/feature/Vigna/radiata/gene/Vradi1556s00010.Vradi.ver6) | 461 | 51.6681 | 5.30 | 37.54, stable | 98.16 | -0.363 |

**Table S1B**. The physiochemical characterization of VrHSP candidates in Vigna radiata genome

| **S. No.** | **Alias Name** | **Start** | **End** | **Genomic Length** | **CDS Length** | **Exon Number** | **LG** |
| --- | --- | --- | --- | --- | --- | --- | --- |
| 1 | VrHSP-20.1 | 2512074 | 2512753 | **909** | **588** | **2** | Scf_7 |
| 2 | VrHSP-20.2 | 2657966 | 2659770 | 1794 | 1207 | 1 | Scf_23 |
| 3 | VrHSP-20.3 | 29257 | 29719 | 714 | 462 | 1 | Scf_51 |
| 4 | VrHSP-20.4 | 856742 | 862507 | 813 | 715 | 1 | Scf_158 |
| 5 | VrHSP-20.5 | 9077393 | 9078069 | 699 | 459 | 1 | 01 |
| 6 | VrHSP-20.6 | 10292943 | 10293504 | 947 | 561 | 1 | 01 |
| 7 | VrHSP-20.7 | 10298896 | 10299457 | 1167 | 561 | 1 | 01 |
| 8 | VrHSP-20.8 | 13610617 | 13611040 | 252 | 252 | 1 | 01 |
| 9 | VrHSP-20.9 | 1164415 | 1165176 | 1064 | 630 | 2 | 02 |
| 10 | VrHSP-20.10 | 4368106 | 4368529 | 763 | 423 | 1 | 02 |
| 11 | VrHSP-20.11 | 22426928 | 22427863 | 1291 | 711 | 2 | 02 |
| 12 | VrHSP-20.12 | 152200 | 155535 | 3703 | 1188 | 3 | Scf_371 |
| 13 | VrHSP-20.13 | 63944 | 64750 | 1162 | 708 | 2 | Scf_373 |
| 14 | VrHSP-20.14 | 12300377 | 12302027 | 1849 | 1057 | 2 | 03 |
| 15 | VrHSP-20.15 | 120041 | 120548 | 887 | 507 | 1 | Scf_406 |
| 16 | VrHSP-20.16 | 33037348 | 33039209 | 2373 | 1363 | 2 | 05 |
| 17 | VrHSP-20.17 | 3607017 | 3610797 | 1087 | 1368 | 2 | 06 |
| 18 | VrHSP-20.18 | 7076500 | 7077129 | 989 | 333 | 2 | 06 |
| 19 | VrHSP-20.19 | 3609602 | 3618595 | 6546 | 2045 | 10 | 07 |
| 20 | VrHSP-20.20 | 35648235 | 35654894 | 3491 | 3166 | 1 | 07 |
| 21 | VrHSP-20.21 | 37810294 | 37810690 | 683 | 396 | 1 | 07 |
| 22 | VrHSP-20.22 | 4309505 | 4310232 | 823 | 642 | 2 | 08 |
| 23 | VrHSP-20.23 | 34201767 | 34202343 | 915 | 576 | 1 | 08 |
| 24 | VrHSP-20.24 | 39760697 | 39765138 | 1179 | 1179 | 1 | 08 |
| 25 | VrHSP-20.25 | 585056 | 585885 | 1051 | 674 | 2 | 09 |
| 26 | VrHSP-20.26 | 3068234 | 3068821 | 1038 | 468 | 2 | 09 |
| 27 | VrHSP-20.27 | 6919725 | 6922287 | 2552 | 1125 | 6 | 11 |
| 28 | VrHSP-20.28 | 7574532 | 7581530 | 7116 | 2327 | 14 | 11 |
| 29 | VrCpn60_TCP1.1 | 404510 | 410698 | 5564 | 2094 | 11 | Scf _23 |
| 30 | VrCpn60_TCP1.2 | 69356 | 79590 | 1008 | 2207 | 13 | Scf _153 |
| 31 | VrCpn60_TCP1.3 | 4534722 | 4536168 | 2099 | 1446 | 1 | vigra.Vr01 |
| 32 | VrCpn60_TCP1.4 | 9989221 | 9993029 | 2270 | 1581 | 1 | vigra.Vr01 |
| 33 | VrCpn60_TCP1.5 | 171569 | 181433 | 6570 | 6450 | 2 | Scf _215 |
| 34 | VrCpn60_TCP1.6 | 6587290 | 6590848 | 2040 | 2153 | 2 | vigra.Vr02 |
| 35 | VrCpn60_TCP1.7 | 7760797 | 7766385 | 1836 | 1771 | 3 | vigra.Vr02 |
| 36 | VrCpn60_TCP1.8 | 22521340 | 22525850 | 2013 | 1892 | 2 | vigra.Vr02 |
| 37 | VrCpn60_TCP1.9 | 261474 | 268901 | 2180 | 911 | 3 | Scf _305 |
| 38 | VrCpn60_TCP1.10 | 111894 | 120611 | 1982 | 1440 | 2 | Scf_372 |
| 39 | VrCpn60_TCP1.11 | 3333015 | 3342794 | 605 | 626 | 2 | 04 |
| 40 | VrCpn60_TCP1.12 | 20412764 | 20419381 | 2098 | 1512 | 2 | 04 |
| 41 | VrCpn60_TCP1.13 | 29315306 | 29319700 | 2063 | 2299 | 2 | 05 |
| 42 | VrCpn60_TCP1.14 | 3570693 | 3576595 | 2175 | 2313 | 1 | 06 |
| 43 | VrCpn60_TCP1.15 | 7801946 | 7809823 | 6421 | 6035 | 12 | 07 |
| 44 | VrCpn60_TCP1.16 | 8888121 | 8894463 | 2310 | 1716 | 1 | 07 |
| 45 | VrCpn60_TCP1.17 | 41598885 | 41609875 | 2005 | 1980 | 2 | 07 |
| 46 | VrCpn60_TCP1.18 | 46876400 | 46886946 | 6043 | 5359 | 4 | 07 |
| 47 | VrCpn60_TCP1.19 | 6821609 | 6826015 | 2141 | 1746 | 3 | 08 |
| 48 | VrCpn60_TCP1.20 | 35852948 | 35857599 | 2014 | 2197 | 1 | 08 |
| 49 | VrCpn60_TCP1.21 | 38544730 | 38555449 | 5346 | 5342 | 13 | 08 |
| 50 | VrCpn60_TCP1.22 | 1865895 | 1872528 | 1976 | 1889 | 2 | 09 |
| 51 | VrCpn60_TCP1.23 | 6176690 | 6183298 | 2068 | 2039 | 1 | 10 |
| 52 | VrHSP-70.1 | 69455 | 73161 | 2965 | 1796 | 2 | Scf_351 |
| 53 | VrHSP-70.2 | 16972593 | 16982489 | 3186 | 2983 | 2 | 04 |
| 54 | VrHSP-70.3 | 19828434 | 19834669 | 768 | 768 | 1 | 04 |
| 55 | VrHSP-70.4 | 31416520 | 31421924 | 2901 | 2789 | 2 | 05 |
| 56 | VrHSP-70.5 | 1840527 | 1845839 | 3095 | 2383 | 2 | 06 |
| 57 | VrHSP-70.6 | 13620531 | 13620741 | 1433 | 210 | 1 | 07 |
| 58 | VrHSP-70.7 | 14606724 | 14608439 | 1433 | 588 | 1 | 07 |
| 59 | VrHSP-70.8 | 33761437 | 33765129 | 2370 | 2307 | 2 | 07 |
| 60 | VrHSP-70.9 | 44140773 | 44142717 | 2200 | 1944 | 1 | 07 |
| 61 | VrHSP-70.10 | 22587914 | 22590867 | 2264 | 1899 | 2 | 08 |
| 62 | VrHSP-70.11 | 30575430 | 30586733 | 1317 | 2496 | 1 | 08 |
| 63 | VrHSP-70.12 | 904841 | 909558 | 2958 | 2443 | 2 | 09 |
| 64 | VrHSP-70.13 | 19526906 | 19530441 | 2491 | 698 | 3 | 10 |
| 65 | VrHSP-70.14 | 20798011 | 20800575 | 2368 | 1167 | 3 | 10 |
| 66 | VrHSP-70.15 | 645765 | 647487 | 2026 | 1722 | 1 | 11 |
| 67 | VrHSP-70.16 | 221 | 407 | 1433 | 186 | 1 | Scf_1393 |
| 68 | VrHSP-70.17 | 524 | 890 | 440 | 366 | 1 | Scf_2697 |
| 69 | VrHSP-90.1 | 33831028 | 33834154 | 2458 | 2184 | 2 | 01 |
| 70 | VrHSP-90.2 | 352518 | 353320 | 2528 | 708 | 2 | Scf_293 |
| 71 | VrHSP-90.3 | 351236 | 352480 | 2528 | 636 | 2 | Scf_293 |
| 72 | VrHSP-90.4 | 509997 | 515668 | 2815 | 2815 | 1 | 06 |
| 73 | VrHSP-90.5 | 817627 | 821127 | 2428 | 1844 | 3 | 06 |
| 74 | VrHSP-90.6 | 36847936 | 36852726 | 2725 | 2641 | 3 | 06 |
| 75 | VrHSP-90.7 | 17635972 | 17651881 | 2868 | 2868 | 1 | 11 |
| 76 | VrHSP-100.1 | 404945 | 418119 | 13412 | 3757 | 11 | Scf_185 |
| 77 | VrHSP-100.2 | 10563534 | 10566845 | 4211 | 1107 | 6 | 01 |
| 78 | VrHSP-100.3 | 12060515 | 12069162 | 8655 | 3594 | 14 | 01 |
| 79 | VrHSP-100.4 | 17801062 | 17807264 | 3052 | 3052 | 1 | 04 |
| 80 | VrHSP-100.5 | 11965251 | 11971510 | 6629 | 3348 | 11 | 05 |
| 81 | VrHSP-100.6 | 19738766 | 19748094 | 9332 | 3497 | 12 | 05 |
| 82 | VrHSP-100.7 | 5257008 | 5263930 | 6803 | 3178 | 5 | 06 |
| 83 | VrHSP-100.8 | 44622482 | 44626479 | 4994 | 3164 | 4 | 07 |
| 84 | VrHSP-100.9 | 53659071 | 53664786 | 5775 | 3059 | 11 | 07 |
| 85 | VrHSP-100.10 | 36091185 | 36094457 | 3707 | 3083 | 3 | 08 |
| 86 | VrHSP-100.11 | 2432935 | 2439038 | 6038 | 998 | 5 | 11 |
| 87 | VrHSP-100.12 | 10343192 | 10351758 | 2076 | 2076 | 1 | 01 |
| 88 | VrHSP-100.13 | 34202871 | 34209090 | 1993 | 1993 | 1 | 08 |
| 89 | VrHSP-100.14 | 13252155 | 13254590 | 2457 | 1752 | 5 | 09 |
| 90 | VrHSP-100.15 | 3466522 | 3473844 | 7283 | 2151 | 15 | 10 |
| 91 | VrHSP-100.16 | 12779853 | 12784586 | 5452 | 2487 | 3 | 03 |
| 92 | VrHSP-100.17 | 16769220 | 16773147 | 4541 | 2463 | 5 | 06 |
| 93 | VrHSP-100.18 | 9517401 | 9522422 | 5204 | 2853 | 5 | 10 |
| 94 | VrHSP-100.19 | 141 | 1663 | 1638 | 1386 | 2 | Scf_1556 |
