# Supplementary material for: Exogenous application of gamma-amino butyric acid alleviates temperature stress in mungbean (Vigna radiata) and its wild non-progenitor (Vigna glabrescens) by regulating heat shock protein genes
Source: Research Square preprint supplement (doi:10.21203/rs.3.rs-7194231/v1), 2025-08-08
Supplement: Supplementary file 2 [file 709aaa186a53d64f99634603.docx]

**Table S1.** List of primers used in present study

| S.No | Gene name | Forward sequence | Reverse sequence | Product size |
| --- | --- | --- | --- | --- |
|  | VrHSP-20.24 | GGCTATGAAGGGCGCAGAAA | TACACACCACCAACGCCAAA | 146 |
|  | VrHSP-20.19 | GCAAAAGCGTGAAAAGCAGC | CACACCGACAGAGGCAAGTA | 166 |
|  | VrHSP-20.6 | TAATGATCGACGTGCCAGGG | GGTACCTTGAACTGCCTCCA |  |
|  | VrHSP-20.13 | GGGCAATAAAGGAAGGCCAG | GTCTTCTCGGCCTTCACCAC | 118 |
|  | VrHSP-20.11 | CGGCGAGAACAATGCAAGAG | CCCAGGCATGTCAAACCTCA | 194 |
|  | VrHSP-20.2 | TGCCAGAGGATGCAGATTGG | CGAGAGGAAGATCACGACCC | 105 |
|  | VrCpn60_TCP1.11 | ATTCTCCCGTGCACTCTTGG | CTGCCTTCAACAAAGCCACC | 184 |
|  | VrCpn60_TCP1.8 | GAAGGTTCGGGTTAGGGCTT | GTCGAAAGCCAACGCCATTT | 180 |
|  | VrCpn60_TCP1.22 | GTTTTGATGCCGCCAAAGGT | TCTGGCACTCGACTAGGAGG | 181 |
|  | VrCpn60_TCP1.20 | GTTGAAGAGCTTGCCGATGC | GTTGAAGAGCTTGCCGATGC | 198 |
|  | vigra.100.2 | CAATGGCAGAATTGGAGGCG | GGGCTGGTTCAGTCAAAGGA | 291 |
|  | VrHSP-90.6 | CGATGAGGAAGTGGACGGTT | TTGGGCGGATCTACAACACC | 127 |
|  | VrHSP-70.2 | AGGTCTATTCCCAAACGCGG | TCGAGTGAAACTCCGCCAAA | 219 |
|  | VrHSP-70.8 | GGATGACCCGTGTGCCTAAA | AAGAGGAGTCACGTCGAGGA | 167 |
|  | VrHSP-70.12 | GAGTCCAAACGTGAAACGCC | ACCCATCATTCCCCTCGGTA | 205 |

Table-S2. Prediction of protein protein interaction network of VrSBTs

| Node 1 | Node 2 | Node 1 Accession | Node 2 Accession | Node 1 Annotation | Node 2 Annotation | Score |
| --- | --- | --- | --- | --- | --- | --- |
| VrCpn60_TCP1.11 | VrCpn60_TCP1.8 | A0A1S3TUB2 | A0A1S3TJ09 | *T-complex protein 1 subunit beta-like.* | *T-complex protein 1 subunit epsilon.* | 0.995 |
| VrCpn60_TCP1.11 | VrHSP-70.12 | A0A1S3TUB2 | A0A1S3VCI4 | *T-complex protein 1 subunit beta-like.* | *Heat shock 70 kDa protein 14 isoform X1.* | 0.437 |
| VrCpn60_TCP1.11 | VrHSP-70.2 | A0A1S3TUB2 | A0A1S3TVP0 | *T-complex protein 1 subunit beta-like.* | *Heat shock 70 kDa protein 17.* | 0.57 |
| VrCpn60_TCP1.11 | VrHSP-70.8 | A0A1S3TUB2 | A0A1S3UUU6 | *T-complex protein 1 subunit beta-like.* | *Heat shock 70 kDa protein, mitochondrial; Belongs to the heat shock protein 70 family.* | 0.424 |
| VrCpn60_TCP1.11 | VrHSP-90.6 | A0A1S3TUB2 | A0A1S3UFW8 | *T-complex protein 1 subunit beta-like.* | *Endoplasmin homolog.* | 0.494 |
| VrCpn60_TCP1.20 | VrHSP-70.12 | A0A1S3V8M8 | A0A1S3VCI4 | *Chaperonin CPN60-2, mitochondrial; Belongs to the chaperonin (HSP60) family.* | *Heat shock 70 kDa protein 14 isoform X1.* | 0.461 |
| VrCpn60_TCP1.20 | VrHSP-70.2 | A0A1S3V8M8 | A0A1S3TVP0 | *Chaperonin CPN60-2, mitochondrial; Belongs to the chaperonin (HSP60) family.* | *Heat shock 70 kDa protein 17.* | 0.682 |
| VrCpn60_TCP1.20 | VrHSP-70.8 | A0A1S3V8M8 | A0A1S3UUU6 | *Chaperonin CPN60-2, mitochondrial; Belongs to the chaperonin (HSP60) family.* | *Heat shock 70 kDa protein, mitochondrial; Belongs to the heat shock protein 70 family.* | 0.874 |
| VrCpn60_TCP1.20 | VrHSP-90.6 | A0A1S3V8M8 | A0A1S3UFW8 | *Chaperonin CPN60-2, mitochondrial; Belongs to the chaperonin (HSP60) family.* | *Endoplasmin homolog.* | 0.577 |
| VrCpn60_TCP1.22 | VrHSP-70.12 | A0A1S3VBL7 | A0A1S3VCI4 | *Chaperonin CPN60-like 2, mitochondrial; Belongs to the chaperonin (HSP60) family.* | *Heat shock 70 kDa protein 14 isoform X1.* | 0.447 |
| VrCpn60_TCP1.22 | VrHSP-70.2 | A0A1S3VBL7 | A0A1S3TVP0 | *Chaperonin CPN60-like 2, mitochondrial; Belongs to the chaperonin (HSP60) family.* | *Heat shock 70 kDa protein 17.* | 0.682 |
| VrCpn60_TCP1.22 | VrHSP-70.8 | A0A1S3VBL7 | A0A1S3UUU6 | *Chaperonin CPN60-like 2, mitochondrial; Belongs to the chaperonin (HSP60) family.* | Heat shock 70 kDa protein, mitochondrial; Belongs to the heat shock protein 70 family. | 0.874 |
| VrCpn60_TCP1.22 | VrHSP-90.6 | A0A1S3VBL7 | A0A1S3UFW8 | *Chaperonin CPN60-like 2, mitochondrial; Belongs to the chaperonin (HSP60) family.* | Endoplasmin homolog. | 0.577 |
| VrCpn60_TCP1.8 | VrCpn60_TCP1.11 | A0A1S3TJ09 | A0A1S3TUB2 | *T-complex protein 1 subunit epsilon.* | *T-complex protein 1 subunit beta-like.* | 0.995 |
| VrCpn60_TCP1.8 | VrHSP-70.12 | A0A1S3TJ09 | A0A1S3VCI4 | *T-complex protein 1 subunit epsilon.* | *Heat shock 70 kDa protein 14 isoform X1.* | 0.502 |
| VrCpn60_TCP1.8 | VrHSP-70.2 | A0A1S3TJ09 | A0A1S3TVP0 | *T-complex protein 1 subunit epsilon.* | *Heat shock 70 kDa protein 17.* | 0.645 |
| VrCpn60_TCP1.8 | VrHSP-70.8 | A0A1S3TJ09 | A0A1S3UUU6 | *T-complex protein 1 subunit epsilon.* | *Heat shock 70 kDa protein, mitochondrial; Belongs to the heat shock protein 70 family.* | 0.449 |
| VrCpn60_TCP1.8 | VrHSP-90.6 | A0A1S3TJ09 | A0A1S3UFW8 | *T-complex protein 1 subunit epsilon.* | *Endoplasmin homolog.* | 0.61 |
| VrHSP-100.2 | VrHSP-70.12 | A0A3Q0F914 | A0A1S3VCI4 | *ATP-dependent Clp protease ATP-binding subunit CLPT1, chloroplastic.* | *Heat shock 70 kDa protein 14 isoform X1.* | 0.405 |
| VrHSP-100.2 | VrHSP-70.2 | A0A3Q0F914 | A0A1S3TVP0 | *ATP-dependent Clp protease ATP-binding subunit CLPT1, chloroplastic.* | *Heat shock 70 kDa protein 17.* | 0.405 |
| VrHSP-100.2 | VrHSP-70.8 | A0A3Q0F914 | A0A1S3UUU6 | *ATP-dependent Clp protease ATP-binding subunit CLPT1, chloroplastic.* | *Heat shock 70 kDa protein, mitochondrial; Belongs to the heat shock protein 70 family.* | 0.405 |
| VrHSP-70.12 | VrCpn60_TCP1.11 | A0A1S3VCI4 | A0A1S3TUB2 | *Heat shock 70 kDa protein 14 isoform X1.* | *T-complex protein 1 subunit beta-like.* | 0.437 |
| VrHSP-70.12 | VrCpn60_TCP1.20 | A0A1S3VCI4 | A0A1S3V8M8 | *Heat shock 70 kDa protein 14 isoform X1.* | *Chaperonin CPN60-2, mitochondrial; Belongs to the chaperonin (HSP60) family.* | 0.461 |
| VrHSP-70.12 | VrCpn60_TCP1.22 | A0A1S3VCI4 | A0A1S3VBL7 | *Heat shock 70 kDa protein 14 isoform X1.* | *Chaperonin CPN60-like 2, mitochondrial; Belongs to the chaperonin (HSP60) family.* | 0.447 |
| VrHSP-70.12 | VrCpn60_TCP1.8 | A0A1S3VCI4 | A0A1S3TJ09 | *Heat shock 70 kDa protein 14 isoform X1.* | *T-complex protein 1 subunit epsilon.* | 0.502 |
| VrHSP-70.12 | VrHSP-100.2 | A0A1S3VCI4 | A0A3Q0F914 | *Heat shock 70 kDa protein 14 isoform X1.* | *ATP-dependent Clp protease ATP-binding subunit CLPT1, chloroplastic.* | 0.405 |
| VrHSP-70.12 | VrHSP-70.8 | A0A1S3VCI4 | A0A1S3UUU6 | Heat shock 70 kDa protein 14 isoform X1. | Heat shock 70 kDa protein, mitochondrial; Belongs to the heat shock protein 70 family. | 0.702 |
| VrHSP-70.12 | VrHSP-90.6 | A0A1S3VCI4 | A0A1S3UFW8 | Heat shock 70 kDa protein 14 isoform X1. | Endoplasmin homolog. | 0.733 |
| VrHSP-70.2 | VrCpn60_TCP1.11 | A0A1S3TVP0 | A0A1S3TUB2 | Heat shock 70 kDa protein 17. | T-complex protein 1 subunit beta-like. | 0.57 |
| VrHSP-70.2 | VrCpn60_TCP1.20 | A0A1S3TVP0 | A0A1S3V8M8 | Heat shock 70 kDa protein 17. | Chaperonin CPN60-2, mitochondrial; Belongs to the chaperonin (HSP60) family. | 0.682 |
| VrHSP-70.2 | VrCpn60_TCP1.22 | A0A1S3TVP0 | A0A1S3VBL7 | Heat shock 70 kDa protein 17. | Chaperonin CPN60-like 2, mitochondrial; Belongs to the chaperonin (HSP60) family. | 0.682 |
| VrHSP-70.2 | VrCpn60_TCP1.8 | A0A1S3TVP0 | A0A1S3TJ09 | Heat shock 70 kDa protein 17. | T-complex protein 1 subunit epsilon. | 0.645 |
| VrHSP-70.2 | VrHSP-100.2 | A0A1S3TVP0 | A0A3Q0F914 | Heat shock 70 kDa protein 17. | ATP-dependent Clp protease ATP-binding subunit CLPT1, chloroplastic. | 0.405 |
| VrHSP-70.2 | VrHSP-70.8 | A0A1S3TVP0 | A0A1S3UUU6 | Heat shock 70 kDa protein 17. | Heat shock 70 kDa protein, mitochondrial; Belongs to the heat shock protein 70 family. | 0.845 |
| VrHSP-70.2 | VrHSP-90.6 | A0A1S3TVP0 | A0A1S3UFW8 | Heat shock 70 kDa protein 17. | Endoplasmin homolog. | 0.974 |
| VrHSP-70.8 | VrCpn60_TCP1.11 | A0A1S3UUU6 | A0A1S3TUB2 | Heat shock 70 kDa protein, mitochondrial; Belongs to the heat shock protein 70 family. | T-complex protein 1 subunit beta-like. | 0.424 |
| VrHSP-70.8 | VrCpn60_TCP1.20 | A0A1S3UUU6 | A0A1S3V8M8 | Heat shock 70 kDa protein, mitochondrial; Belongs to the heat shock protein 70 family. | Chaperonin CPN60-2, mitochondrial; Belongs to the chaperonin (HSP60) family. | 0.874 |
| VrHSP-70.8 | VrCpn60_TCP1.22 | A0A1S3UUU6 | A0A1S3VBL7 | Heat shock 70 kDa protein, mitochondrial; Belongs to the heat shock protein 70 family. | Chaperonin CPN60-like 2, mitochondrial; Belongs to the chaperonin (HSP60) family. | 0.874 |
| VrHSP-70.8 | VrCpn60_TCP1.8 | A0A1S3UUU6 | A0A1S3TJ09 | Heat shock 70 kDa protein, mitochondrial; Belongs to the heat shock protein 70 family. | T-complex protein 1 subunit epsilon. | 0.449 |
| VrHSP-70.8 | VrHSP-100.2 | A0A1S3UUU6 | A0A3Q0F914 | Heat shock 70 kDa protein, mitochondrial; Belongs to the heat shock protein 70 family. | ATP-dependent Clp protease ATP-binding subunit CLPT1, chloroplastic. | 0.405 |
| VrHSP-70.8 | VrHSP-70.12 | A0A1S3UUU6 | A0A1S3VCI4 | Heat shock 70 kDa protein, mitochondrial; Belongs to the heat shock protein 70 family. | Heat shock 70 kDa protein 14 isoform X1. | 0.702 |
| VrHSP-70.8 | VrHSP-70.2 | A0A1S3UUU6 | A0A1S3TVP0 | Heat shock 70 kDa protein, mitochondrial; Belongs to the heat shock protein 70 family. | Heat shock 70 kDa protein 17. | 0.845 |
| VrHSP-70.8 | VrHSP-90.6 | A0A1S3UUU6 | A0A1S3UFW8 | Heat shock 70 kDa protein, mitochondrial; Belongs to the heat shock protein 70 family. | Endoplasmin homolog. | 0.735 |
| VrHSP-90.6 | VrCpn60_TCP1.11 | A0A1S3UFW8 | A0A1S3TUB2 | Endoplasmin homolog. | T-complex protein 1 subunit beta-like. | 0.494 |
| VrHSP-90.6 | VrCpn60_TCP1.20 | A0A1S3UFW8 | A0A1S3V8M8 | Endoplasmin homolog. | Chaperonin CPN60-2, mitochondrial; Belongs to the chaperonin (HSP60) family. | 0.577 |
| VrHSP-90.6 | VrCpn60_TCP1.22 | A0A1S3UFW8 | A0A1S3VBL7 | Endoplasmin homolog. | Chaperonin CPN60-like 2, mitochondrial; Belongs to the chaperonin (HSP60) family. | 0.577 |
| VrHSP-90.6 | VrCpn60_TCP1.8 | A0A1S3UFW8 | A0A1S3TJ09 | Endoplasmin homolog. | T-complex protein 1 subunit epsilon. | 0.61 |
| VrHSP-90.6 | VrHSP-70.12 | A0A1S3UFW8 | A0A1S3VCI4 | Endoplasmin homolog. | Heat shock 70 kDa protein 14 isoform X1. | 0.733 |
| VrHSP-90.6 | VrHSP-70.2 | A0A1S3UFW8 | A0A1S3TVP0 | Endoplasmin homolog. | Heat shock 70 kDa protein 17. | 0.974 |
| VrHSP-90.6 | VrHSP-70.8 | A0A1S3UFW8 | A0A1S3UUU6 | Endoplasmin homolog. | Heat shock 70 kDa protein, mitochondrial; Belongs to the heat shock protein 70 family. | 0.735 |
