# Supplementary material for: Exogenous application of gamma-amino butyric acid alleviates temperature stress in mungbean (Vigna radiata) and its wild non-progenitor (Vigna glabrescens) by regulating heat shock protein genes
Source: Research Square preprint supplement (doi:10.21203/rs.3.rs-7194231/v1), 2025-08-08
Supplement: Supplementary file 3 [file ef070d55fc108b7f4d4446e7.docx]

| S.No | Gene name | Forward sequence | Reverse sequence | Product size |
| --- | --- | --- | --- | --- |
|  | VrHSP-20.24 | GGCTATGAAGGGCGCAGAAA | TACACACCACCAACGCCAAA | 146 |
|  | VrHSP-20.19 | GCAAAAGCGTGAAAAGCAGC | CACACCGACAGAGGCAAGTA | 166 |
|  | VrHSP-20.6 | TAATGATCGACGTGCCAGGG | GGTACCTTGAACTGCCTCCA |  |
|  | VrHSP-20.13 | GGGCAATAAAGGAAGGCCAG | GTCTTCTCGGCCTTCACCAC | 118 |
|  | VrHSP-20.11 | CGGCGAGAACAATGCAAGAG | CCCAGGCATGTCAAACCTCA | 194 |
|  | VrHSP-20.2 | TGCCAGAGGATGCAGATTGG | CGAGAGGAAGATCACGACCC | 105 |
|  | VrCpn60_TCP1.11 | ATTCTCCCGTGCACTCTTGG | CTGCCTTCAACAAAGCCACC | 184 |
|  | VrCpn60_TCP1.8 | GAAGGTTCGGGTTAGGGCTT | GTCGAAAGCCAACGCCATTT | 180 |
|  | VrCpn60_TCP1.22 | GTTTTGATGCCGCCAAAGGT | TCTGGCACTCGACTAGGAGG | 181 |
|  | VrCpn60_TCP1.20 | GTTGAAGAGCTTGCCGATGC | GTTGAAGAGCTTGCCGATGC | 198 |
|  | vigra.100.2 | CAATGGCAGAATTGGAGGCG | GGGCTGGTTCAGTCAAAGGA | 291 |
|  | VrHSP-90.6 | CGATGAGGAAGTGGACGGTT | TTGGGCGGATCTACAACACC | 127 |
|  | VrHSP-70.2 | AGGTCTATTCCCAAACGCGG | TCGAGTGAAACTCCGCCAAA | 219 |
|  | VrHSP-70.8 | GGATGACCCGTGTGCCTAAA | AAGAGGAGTCACGTCGAGGA | 167 |
|  | VrHSP-70.12 | GAGTCCAAACGTGAAACGCC | ACCCATCATTCCCCTCGGTA | 205 |

**Table S1.** List of primers used in present study
